1 **Computational optical sectioning by phase-space imaging with**  
2 **an incoherent multiscale scattering model**

3 Yi Zhang<sup>1,2\*</sup>, Zhi Lu<sup>1,2\*</sup>, Jiamin Wu<sup>1,2\*,†</sup>, Xing Lin<sup>1,2,3</sup>, Dong Jiang<sup>4</sup>, Yeyi Cai<sup>1</sup>, Jiachen  
4 Xie<sup>1,2</sup>, Tianyi Zhu<sup>1,2</sup>, Xiangyang Ji<sup>1,2†</sup> & Qionghai Dai<sup>1,2,3†</sup>

5 *<sup>1</sup>Department of Automation, Tsinghua University, Beijing, 100084, China*

6 *<sup>2</sup>Institute for Brain and Cognitive Sciences, Tsinghua University, Beijing 100084, China*

7 *<sup>3</sup>Beijing Innovation Centre for Future Chips, Tsinghua University, Beijing 100084, China*

8 *<sup>4</sup>State Key Laboratory of Membrane Biology, Tsinghua University–Peking University*  
9 *Joint Centre for Life Sciences, Beijing Frontier Research Centre for Biological Structure,*  
10 *School of Life Sciences, Tsinghua University, Beijing, 100084, China*

11

12 *\*These authors contributed equally to this work*

13

14 <sup>†</sup>Correspondence: [wujiamin@tsinghua.edu.cn](mailto:wujiamin@tsinghua.edu.cn) (J.W.), [xyji@tsinghua.edu.cn](mailto:xyji@tsinghua.edu.cn) (X.J.),  
15 [qhdai@tsinghua.edu.cn](mailto:qhdai@tsinghua.edu.cn) (Q.D.)

16

17 **Optical sectioning is essential for fluorescence imaging in thick tissue to extract in-**  
18 **focus information from noisy background. Traditional methods achieve optical**  
19 **sectioning by rejecting the out-of-focus photons at a cost of photon efficiency,**  
20 **resulting in a tradeoff between sectioning capability and detection parallelization.**  
21 **Here, we show phase-space imaging with an incoherent multiscale scattering model**  
22 **can achieve computational optical sectioning with ~20 dB improvement for signal-**  
23 **to-background ratio in scattering medium, while maximizing the detection**  
24 **parallelization by imaging the entire volume simultaneously. We validated the**  
25 **superior performance by imaging various biological dynamics in *Drosophila***  
26 **embryos, zebrafish larvae, and mice.**

27 The beauty of life lies in the complexity and variety of cellular behaviors in three-  
28 dimensional (3D) living organisms, which are difficult to appreciate without optical  
29 sectioning<sup>1-3</sup>, as the information can be easily flooded in the severe noisy background.  
30 Various methods have been proposed to achieve optical sectioning by rejecting the out-  
31 of-focus photons either physically or computationally, such as confocal microscopy<sup>4,5</sup>,  
32 two-photon microscopy<sup>6,7</sup>, light-sheet microscopy<sup>8,9</sup>, and structured illumination  
33 microscopy<sup>10,11</sup>. However, these methods still require scanning of points, lines, or planes  
34 for 3D imaging, leading to the tradeoff between the sectioning capability and detection  
35 parallelization<sup>1,3,12</sup>. Such a tradeoff intrinsically restricts the 3D imaging speed in  
36 fluorescence imaging, especially with a limited photon budget set by the sample  
37 health<sup>1,12,13</sup>. In addition, it's hard to remove the scattered photons due to the lack of depth-  
38 dependent features.

39 Phase-space imaging, by collecting the high-dimensional local variances of the  
40 coherence, provides a new imaging framework with digital synthesis of the partially-  
41 coherent light field, which shows strong robustness to scattering and aberrations<sup>14-18</sup>. As  
42 a typical example, light-field microscopy (LFM)<sup>19</sup> captures the phase-space

43 measurements within a snapshot by a microlens array<sup>20</sup>, facilitating various applications  
44 in biology, such as imaging hemodynamics<sup>21</sup> and large-scale neural activities<sup>14,22</sup>.  
45 Different from wide-field imaging with a shallow depth of field (DOF)<sup>23-25</sup>, LFM keeps  
46 the photons focused along different angles within the extended depth of field and  
47 maximize the parallelization by imaging the entire volume simultaneously. However, it  
48 suffers from great degradation in thick tissue such as the mammalian brain, due to  
49 scattering and dense fluorescence labeling. While many efforts in hardware have been  
50 made to achieve additional optical sectioning<sup>26-28</sup> at the cost of temporal resolution, space  
51 constraints and system compactness, the imaging model of this computational framework  
52 has barely been explored, especially for complicated imaging environment in deep  
53 tissue<sup>29,30</sup>.

54 Here, we show the necessity of an accurate imaging model in the complete space  
55 to unlock the full power of phase-space imaging in thick tissue. With an incoherent  
56 multiscale multiple-scattering model, phase-space imaging can achieve snapshot  
57 quantitative 3D information with optical sectioning computationally in densely labeled  
58 or scattering samples. This method is termed as quantitative LFM (QLFM). We find that  
59 the severe degradation of traditional LFM in thick tissue mainly results from the  
60 incomplete space and ideal imaging model utilized during reconstruction<sup>14,29,30</sup>. By  
61 building up the incoherent imaging process in phase-space domain accurately with  
62 various factors, including the nonuniform resolution of different axial planes, out-of-  
63 focus fluorescence across a large range, multiple scattering, and system aberrations, we  
64 can not only improve the resolution and contrast with significantly-reduced  
65 computational costs, but also achieve two-orders-of-magnitude improvement in signal-  
66 to-background ratio (SBR) over traditional algorithms and wide-field microscopy  
67 (WFM), which is critical for quantitative biological analysis. To demonstrate the versatile  
68 applications, we imaged various 3D biological dynamics in different specimens,  
69 including the zebrafish larvae heart beating, blood flow, and whole-brain neural activity,

70 *Drosophila* embryo development, and mouse brain neural activity with notably better  
71 performance than that of traditional ideal models without increasing the system  
72 complexity.

## 73 **Results**

### 74 **Principle and implementation of QLFM**

75 As a general computational model for incoherent conditions, our QLFM method is  
76 compatible with different schematics of phase-space imaging. Here, we chose the  
77 unfocused LFM for experimental demonstrations by inserting a microlens array at the  
78 image plane of a normal wide-field microscope (Fig. 1a). A 4f system was used to relay  
79 the back focal plane of the microlens array at the image sensor, with each microlens  
80 covering approximately  $13 \times 13$  sensor pixels (Methods). Once set up, the high-resolution  
81 3D range of LFM was fixed with a specific objective. To flexibly adjust the volume size  
82 for different specimens, we applied a piezo stage for high-speed axial scanning at large  
83 axial steps<sup>9</sup>. With the matched numerical aperture (NA), LFM provides an extended depth  
84 of field  $\sim 169$ -times larger than that of WFM, which makes it very different from other  
85 wide-field imaging methods. The fluorescence signals far from the focal plane exhibit  
86 similar Gaussian backgrounds in WFM<sup>23–25</sup>, while they show apparent distinguishable  
87 features between different angular components captured by LFM within a snapshot  
88 (Supplementary Fig. 1 and Supplementary Video 1). We find that these depth-dependent  
89 features provide LFM with a similar capability of computational optical sectioning as  
90 structured illumination microscopy<sup>31</sup>. The 3D out-of-focus fluorescence up to the  
91 centimeter scale can be reconstructed at low resolution, as long as we take it into  
92 consideration in the multislice model as a complete space. These layers far from the native  
93 objective plane have usually been neglected in previous methods due to the limited  
94 computational resources and contributed considerable background noises and artifacts in  
95 the high-resolution range (Fig. 1b). To address this problem, we propose a multiscale  
96 model in the phase-space domain by resampling the volume based on the nonuniform  
97 resolution of different axial planes, avoiding many unnecessary calculations in a complete  
98 space (Fig. 1b, Supplementary Fig. 2 and Methods). We then conducted a numerical

99 simulation with gradually increasing background levels to show the significantly  
100 improved quantitative property of the multiscale model, which is barely considered in  
101 previous studies but important for biological analysis (Supplementary Fig. 3).

102         Except for out-of-focus fluorescence, the scattered photons pose another  
103 challenge in thick tissue, which cannot be rejected by optical sectioning due to the depth-  
104 independent property. Although multislice scattering models have achieved great success  
105 in the coherent imaging modalities<sup>32</sup>, they are barely considered in deconvolution  
106 algorithms for incoherent fluorescence imaging. As the 4D phase-space measurements  
107 can fully describe the partially coherent light-field distributions, they provide an  
108 opportunity to infer the native 3D fluorescence as well as the nonuniform 3D scattering  
109 coefficients. Here, we derived a multislice multiple-scattering model to differentiate the  
110 emission fluorescence and scattered photons based on the first Born approximation in the  
111 incoherent condition<sup>33</sup> (Fig. 1c and Supplementary Note 1). Then, we applied the  
112 alternating direction method of multipliers (ADMM) algorithm<sup>34</sup> with the multiscale  
113 model to update the volumetric fluorescence and 3D scattering potentials iteratively  
114 (Supplementary Fig. 2 and Supplementary Video 1).

115         By modeling both the out-of-focus and scattered photons, we retrieved the 3D  
116 fluorescence distribution quantitatively in thick tissue. To show the pipeline, we imaged  
117 a GFP-labeled tumor spheroid with a 63 $\times$ /1.4 NA oil-immersion objective at an axial step  
118 of 10  $\mu$ m for 10 subvolumes. Strong background fluorescence was observed in the raw  
119 LF images, which was effectively removed by the capability of computational optical  
120 sectioning in QLFM (Fig. 1d). Each LF image has a specific axial range for high-  
121 resolution 3D components. The large 3D volume with multiple axial steps was  
122 reconstructed as a whole during the iterations, making full use of the overlapped axial  
123 range and providing a better estimation of the background and uniform resolution at  
124 different axial planes (Methods and Supplementary Video 1). In contrast, traditional LFM

125 shows strong artifacts due to crosstalk from the background. The axial side, with larger  
126 out-of-focus photons, tends to have higher intensities, demonstrating the loss of the  
127 quantitative property in thick tissue.

## 128 **Characterization of QLFM**

129 To quantitatively evaluate the improvement of QLFM, we imaged various 2- $\mu\text{m}$   
130 fluorescence beads embedded in a tissue-mimicking phantom made of intralipid and  
131 agarose with a 40 $\times$ /1.0 NA objective and calculated the average SBR at different  
132 penetration depths (Methods, Fig. 2a, and Supplementary Fig. 4). By comparing with  
133 WFM and different LFM models, shown in Fig. 2b, we found that the naive imaging  
134 model of traditional LFM resulted in a similar performance as WFM in tissue penetration.  
135 Our multiscale scattering model fully exploits the capability of LFM in deep-tissue  
136 imaging with  $\sim 20$  dB SBR improvement over WFM. Such a great improvement facilitates  
137 QLFM high-speed 3D imaging in thick tissue. We then imaged the same densely labeled  
138 *Drosophila* brain by QLFM, traditional LFM, WFM, and confocal microscopy for  
139 comparison (Supplementary Fig. 5). Despite reduced resolution due to the tradeoff  
140 between spatial and angular resolutions in LFM, QLFM showed great sectioning  
141 capability comparable to that of confocal microscopy without axial-scanning artifacts,  
142 which was much better than those of traditional LFM and WFM.

143 Another problem hindering the quantitative reconstruction in LFM is the  
144 inaccurate estimation of the complicated high-dimensional PSF. As shown in Fig. 2c, the  
145 system aberration will result in great system errors between the ideal PSF and the  
146 experimental PSF measured with a sub-diffraction-limited fluorescence bead. We  
147 propose a phase-retrieval-based algorithm to estimate the system aberration by iteratively  
148 shrinking the disparity between the simulated PSF and the captured PSF along different  
149 angular components with a single image (Supplementary Fig. 6). We find that the

150 calibrated PSF with the aberration wavefront can greatly reduce the reconstruction  
151 artifacts close to the native objective plane (Supplementary Fig. 6c). Numerical  
152 simulations on different levels of aberrations also shows the effectiveness of the method  
153 (Supplementary Fig. 7). We then characterized the system resolution by imaging 500-nm  
154 fluorescence beads distributed in 1% agarose with a 40×/1.0 NA water-immersion  
155 objective. The average full width at half-maximum (FWHM) was used to estimate the  
156 lateral and axial resolutions at different axial planes (Fig. 2d). In addition to the improved  
157 resolution, QLFM with high-speed axial scanning at a step size of 30 μm for 5 planes has  
158 a uniform resolution of approximately 1.8×1.8×2.5 μm<sup>3</sup> across a large depth range  
159 covering ~ 330×330×180 μm<sup>3</sup>. Moreover, as the multiscale model in phase-space domain  
160 avoids the unnecessary up-sampling based on the effective resolution, it can reduce the  
161 memory and computing time by orders of magnitude, especially for large depth ranges  
162 during reconstruction to get rid of background (Fig. 2e). By modeling the same volume  
163 range, our multiscale model with adaptive sampling rate shows the same performance as  
164 traditional methods, but reduces the computing time from several hours to several  
165 seconds, on a desktop computer equipped with a normal graphical processing unit (CPU:  
166 Intel i9-9980XE, RAM: 128 GB, GPU: NVIDIA GeForce RTX 2080 Ti), facilitating the  
167 practical use of QLFM.

### 168 **High-speed 3D imaging of *Drosophila* embryo and Zebrafish larvae**

169 To demonstrate the superior performance of QLFM over previous methods using compact  
170 systems, we performed *in vivo* imaging of various fast biological dynamics in different  
171 specimens. First, we imaged the whole-embryo development of histone-labeled  
172 *Drosophila* at the millisecond scale with both 40×/1.0 NA (Figs. 3a and b) and 20×/0.5  
173 NA (Figs. 3c and d) objectives for comparison. Different from previous methods  
174 capturing only part of the volume at a time<sup>35</sup>, LFM achieves better photon efficiency with  
175 low phototoxicity by illuminating and detecting the entire volume simultaneously. While



176 there was almost no contrast in traditional LFM due to the dense labeling and strong  
177 scattering, QLFM could still distinguish single cells deep in the embryo at the millisecond  
178 scale, extending the applications of LFM to developmental biology.

179         Second, we performed *in vivo* imaging of heart-beating dynamics in zebrafish  
180 larvae, which are difficult to fully capture without simultaneous exposure of the whole  
181 volume at high speed. Traditional LFM shows low resolution and contrast with severe  
182 artifacts (Fig. 4a), but QLFM, with a more accurate computational model, could obtain  
183 artifact-free high-resolution 3D volumes without the requirement of additional light-sheet  
184 illumination and multiview objectives (Figs. 4b and c, and Supplementary Figs. 8 and 9).  
185 We found successive improvement with increasing model complexity, indicating the  
186 necessity of various factors in the model, including out-of-focus fluorescence, sample  
187 scattering, and system aberrations (Supplementary Video 2).

188         Whole-brain neural recording in zebrafish larvae is another typical application of  
189 LFM, but the imaging performance is far from satisfactory due to the densely packed  
190 neurons without complicated systems<sup>14</sup> (Fig. 4d). Although the spatiotemporal sparsity  
191 facilitates the accurate localization and extraction of neural signals<sup>36,37</sup>, it is still  
192 susceptible to nonuniform background fluorescence and inevitable structural changes in  
193 living animals. By imaging the whole-brain neural activities in zebrafish larvae at 24 Hz  
194 with a 20×/0.5 NA objective, we demonstrate that QLFM can achieve effective single-  
195 neuron resolution with proper models to remove both out-of-focus and scattered photons  
196 for each single frame without the requirement to calculate the standard deviation of many  
197 frames for better contrast (Figs. 4e and f, and Supplementary Video 3). The temporal  
198 traces of several neurons with simple region-of-interest (ROI) averaging demonstrate the  
199 increased contrast and reduced crosstalk between adjacent neurons in QLFM (Fig. 4g).

200

## 201 **Large-scale 3D calcium imaging in mice brain**

202           The mammalian brain is a more challenging case due to its strong scattering and  
203 dense neural structures. We tested the performance of QLFM by imaging the 3D calcium  
204 activities in an awake head-fixed mouse, which was labeled with GCaMP6s by virus  
205 injection, under a 20×/0.5 NA objective. To visualize the 3D distribution of neurons,  
206 traditional LFM usually requires the standard deviation of thousands of frames to reduce  
207 the background (Supplementary Fig. 10a). However, the 3D signals of a single frame are  
208 usually flooded in the background fluctuations due to the low SBR (Fig. 5a). In contrast,  
209 with the capability of computational optical sectioning, QLFM shows significantly  
210 improved contrast (Fig. 5b and Supplementary Video 4). In addition to the detection of  
211 more neurons (Supplementary Fig. 10a), QLFM allows the measurement of calcium  
212 dynamics in a quantitative manner without the need for additional background  
213 subtractions or filtering to improve the contrast, making it more reliable for large-scale  
214 neural recording (Fig. 5c). Background fluorescence usually increases with the increasing  
215 of NA due to the smaller depth of field, especially for the wide-field imaging. We  
216 therefore imaged the same mouse with a 40×/1.0 NA water-immersion objective at  
217 different depths (Supplementary Figs. 10b-e and Supplementary Video 5). QLFM not  
218 only resolved more neurons with better resolution and contrast than traditional LFM but  
219 also showed stable performance at different depths up to 300  $\mu\text{m}$  (Figs. 5d and e).

220           By high-speed axial scanning, we could further increase the axial coverage with  
221 redundant 3D imaging speed for calcium dynamics. We then conducted millisecond-scale  
222 calcium imaging in awake double-transgenic *Rasgrf2-2A-dCre/Ai148D* mice across a  
223 large volume covering  $\sim 700 \times 700 \times 180 \mu\text{m}^3$  by high-speed scanning of 3 planes. While  
224 there was barely contrast in traditional LFM due to the severe artifacts especially in the  
225 axial domain, which was similar to previous work<sup>36</sup>, QLFM showed a much larger

226 penetration depth with uniform resolution (Figs. 5f and g and Supplementary Video 6).  
227 Even the neurons located  $\sim 400$   $\mu\text{m}$  deep exhibited remarkable calcium responses.

## 228 **Discussion**

229 In summary, we developed an incoherent multiscale scattering model to fully exploit the  
230 intrinsic high-dimensional property of phase-space measurements and achieved  
231 computational optical sectioning, facilitating high-speed, large-scale, quantitative 3D  
232 imaging in deep tissue with a compact system.

233 Different from wide-field imaging with a tight focal plane, phase-space imaging  
234 provides a tomographic framework by keeping the photons focused along different angles  
235 with an extended depth of field. Such a process makes the signals originated from  
236 different axial planes show much more distinguishable features than WFM, which can be  
237 utilized to remove background fluorescence far from the native objective plane  
238 computationally, as long as we model the imaging process in a complete space.  
239 Additional confocal rejection or light-sheet illuminations will definitely further reduce  
240 the shot-noise fluctuations by getting rid of the background photons physically but at the  
241 cost of system compactness, space constraints, or detection parallelization.

242 In addition, as a novel computational model, our method is compatible with  
243 different phase-space imaging schemes without the requirement of any hardware  
244 modifications. In combination with the low phototoxicity and high photon efficiency, the  
245 orders-of-magnitude reductions in background fluorescence, artifacts, and computational  
246 costs enable the practical and versatile applications of QLFM as a compact and robust  
247 add-on to normal wide-field microscopy, making the advanced imaging capability  
248 generally accessible to the broad biology community.

249

## 250 **Methods**

### 251 **Experimental setup**

252 Our QLFM system works as an add-on to a normal epifluorescence microscope, with a  
253 microlens array inserted at the image plane. A customized upright microscope was used  
254 for mouse experiments, while a commercial inverted microscope (Zeiss Observer Z1) was  
255 used for the others. Another 4f system (with a magnification of 0.845) relayed the back  
256 focal plane of the microlens array (with a pitch size of 100  $\mu\text{m}$  and focal length of 2.1  
257 mm) to the camera (Andor Zyla 4.2 plus,  $2,048 \times 2,048$  pixels) so that each microlens  
258 covered  $\sim 13 \times 13$  sensor pixels, corresponding to a  $2.15 \mu\text{m} \times 2.15 \mu\text{m}$  area at the sample  
259 plane for the  $40\times/1.0$  NA water-immersion objective. Multiple lasers (488 nm and 561  
260 nm) were used for the fluorescence excitation of multiple channels, which were  
261 synchronized with the camera for time division multiplexing. A piezo objective scanner  
262 (PI P-725.4CD) was used for high-speed axial scanning with a resolution of 1.25 nm at  
263 100 Hz. Detailed imaging conditions and reconstruction parameters for all fluorescence  
264 experiments in the paper, including the excitation power, exposure time, frame rate, voxel  
265 size, fluorophore, protein, filter set, and objective, are illustrated in Supplementary Table  
266 1.

267

### 268 **3D deconvolution with a multiscale scattering model**

269 To reconstruct the 3D fluorescence information in deep tissue in a quantitative way, we  
270 propose a novel 3D deconvolution algorithm with a multiscale scattering model to  
271 iteratively update both the emission fluorescence and scattering photons across an  
272 extremely large depth range (Fig. 1c). The whole pipeline of the algorithm with the  
273 pseudocode is shown in Supplementary Fig. 2.

274 With simple pixel realignment, the raw LF data can be represented as multiple  
275 angular components, or smoothed phase-space measurements<sup>20</sup>, which can be used for

276 phase-space deconvolution<sup>29</sup> to reduce artifacts and increase the convergence speed.  
277 However, the reconstructed volume, regardless of the deconvolution algorithm<sup>29,30</sup>, is  
278 limited to only dozens of axial planes due to the heavy computational cost. Therefore, the  
279 out-of-focus fluorescence has usually been modeled as a constant in previous methods,  
280 which is fine for thin samples but leads to severe artifacts and background noise in deep  
281 tissue with nonuniform out-of-focus distributions. Fortunately, both the lateral and axial  
282 resolution of LFM will gradually decrease with increasing distances from the native  
283 objective plane. We can establish a multiscale grid to sample a large 3D volume at  
284 different intervals based on the characterized resolution with an exponential fit  
285 (Supplementary Fig. 2). The out-of-focus fluorescence with a nonuniform 3D distribution  
286 can then be estimated with the depth-dependent features within a large depth of field  
287 (Supplementary Fig. 1), akin to structured illumination microscopy exhibiting  
288 computational optical sectioning. As this method does not require dense axial sampling  
289 and a lateral sampling rate as high as the camera pixel number for each plane, which was  
290 necessary in previously reported methods due to the spatially variant PSF<sup>30</sup>, the unknown  
291 variables can be reduced by orders of magnitude to accelerate the reconstruction speed  
292 when modeling the out-of-focus fluorescence of a much larger volume (Fig. 2e). For the  
293 same volume size, our multiscale model can achieve almost the same performance as  
294 traditional dense-sampling models at a much faster speed. In contrast, the traditional  
295 method<sup>29</sup>, without a sufficient axial range in the model, shows apparent artifacts and an  
296 increase in the background.

297         Scattering is a recurring challenge in thick tissue and is the fundamental limitation  
298 of the penetration depth in light microscopy, leading to reduced resolution and contrast<sup>38</sup>.  
299 Although the multilayer scattering model has recently achieved great success in coherent  
300 imaging modalities, such as diffraction tomography<sup>39</sup>, the spatially nonuniform influence  
301 of scattering is barely considered in fluorescence imaging. LFM provides a great  
302 opportunity to differentiate emission fluorescence and scattered photons with its 4D

303 phase-space measurements. We propose a multilayer scattering model based on the first  
304 Born approximation in incoherent conditions by describing the relation between the  
305 emission fluorescence  $I^{(i)}(\mathbf{r})$  and scattered photons  $I^{(s)}(\mathbf{r})$  as follows:

$$306 \quad I^{(s)}(\mathbf{r}) = \frac{1}{2} \int_V F(\mathbf{r}') I^{(i)}(\mathbf{r}') \frac{1}{\|\mathbf{r} - \mathbf{r}'\|_2} d^3 r',$$

307 where  $F$  is defined as the scattering potential energy at the 3D position  $r$ , and  $V$  is the  
308 whole 3D volume range. The detailed derivations and discretized version are illustrated  
309 in Supplementary Note 1. Then, an ADMM framework<sup>34</sup> is used to iteratively update the  
310 sample information and the scattered photons to retrieve the quantitative fluorescence  
311 distributions in deep tissue with increased contrast and resolution (Supplementary Fig.  
312 2). The reconstruction time of a single volume with a full FOV of the sensor used here is  
313 about several seconds for a normal desktop computer with a graphical processing unit.

### 314 **3D deconvolution with axial scanning for LFM**

315 The high-resolution 3D range of LFM for a snapshot is fixed for a specific objective.  
316 High-speed axial scanning at a large step size is a straightforward method to flexibly  
317 adjust the depth range and 3D imaging speed. Such a capability is important for versatile  
318 applications with different requirements for the volume size and imaging speed.  
319 However, traditional methods show severe artifacts at the stitching edges at low contrast  
320 (Figs. 1d and 5f), as they usually reconstruct each subvolume based on every single LF  
321 image separately and stitch the subvolumes in the axial domain<sup>36</sup>. Here, with the  
322 multiscale model in QLFM, we take the entire 3D volume as a whole with the multiscale  
323 sampling rate during reconstruction. As shown in Supplementary Video 1, after pixel  
324 realignment of all the raw LF images, we can achieve multiple focal stacks for different  
325 angular components, making full use of the intrinsic continuous property of different  
326 angular components in the axial domain. Due to the large depth of field for each angular  
327 component in QLFM, we can use a large step for axial scanning with much less time

328 required to cover the same volume than in WFM. Then we update the entire large volume  
329 as a whole along different angles, viewing each angular focal stack as the minimum unit  
330 to calculate the error map for each iteration. Such a process is akin to wide-field  
331 deconvolution first for each angle followed by tomographic reconstruction later for  
332 different angles. Finally, the same ADMM framework is applied to the entire volume to  
333 update the emission fluorescence and scattered photons iteratively. In this case, uniform  
334 resolution can be achieved at different axial planes across a large depth range without any  
335 artifacts (Fig. 1d and 2d). In addition, the computational cost can be further reduced, as  
336 we can conduct 3D deconvolution with the phase-space PSF for each angular focal stack.

### 337 **Phase-retrieval-based PSF calibration**

338 The PSF of traditional LFM is calculated based on wave optics theory in an ideal imaging  
339 condition<sup>29,30</sup>. However, the experimental imaging system usually has complicated  
340 system aberrations, which will not only reduce the imaging resolution but also introduce  
341 severe reconstruction artifacts close to the native objective plane. Here, we propose a  
342 phase-retrieval-based algorithm to calibrate the experimental PSF with a single image of  
343 subdiffraction-limited fluorescence beads (Supplementary Fig. 6). The simulated PSF is  
344 first initialized with experimental parameters without any aberration wavefront. Then, we  
345 calculate the correlations between the captured image and the simulated PSF along  
346 different angular components to estimate the wavefront error at different sub-apertures.  
347 The aberrated wavefront of the whole NA is then integrated from the correlation map for  
348 continuous distributions. The estimated wavefront is fitted with Zernike polynomials and  
349 fed into the wave optics model to generate the new simulated PSF, which is used again  
350 to match with the captured PSF. The calibrated PSF is iteratively updated through the  
351 above process until the phase map converges, which usually takes approximately 3~4  
352 iterations. Interestingly, we found that the experimental system with spherical aberrations  
353 can remove the reconstruction artifacts close to the native objective plane as long as we  
354 had an accurate estimation of the aberration wavefront.

355

### 356 **Fluorescence bead preparation for system characterization**

357 For resolution characterization, 500-nm yellow-green fluorescent microspheres (Thermo  
358 Scientific, FluoSpheres, carboxylate-modified microspheres) were mixed with 1%  
359 agarose at a ratio of 1:1,000,000. We placed the mixture in a 35-mm petri dish and  
360 captured ~100 LF images for statistical analysis with a 40×/1.0 NA water-immersion  
361 objective. We then calculated the FWHM of the lateral and axial profiles of the  
362 reconstructed beads on different axial planes. For each block covering 10 μm, we chose  
363 10 beads with the highest fitting degree to calculate the mean and standard deviation.

364 For SBR characterization, we fabricated a scattering phantom with the mixture of  
365 1% agarose, 1% intralipid (Absin 68890-65-3, 20% emulsion), and 0.025% 2-μm  
366 fluorescence beads, which was placed in a 35-mm petri dish. The 2-μm fluorescence  
367 beads (Thermo Scientific, FluoSpheres, carboxylate-modified microspheres) were  
368 randomly distributed in the intralipid and imaged using a 40×/1.0 NA water-immersion  
369 objective. The reconstructed mean intensity of the beads was viewed as the signal, while  
370 the mean intensity of the reconstructed background without samples was viewed as the  
371 background. Several reconstructed slices at different imaging depths are shown in  
372 Supplementary Fig. 4.

### 373 **Tumor spheroid preparation**

374 B16 cells (ATCC® CRL-6475™, mouse skin melanoma cells) were purchased from  
375 ATCC and cultured in RPMI 1640 medium supplemented with 10% FBS, 1% pen/strep  
376 antibiotics and 1% NEAA (all from GIBCO). Cells were then transfected with the EGFP-  
377 PH plasmid (Addgene Plasmid #96948), and stable EGFP-expressing B16 cells were  
378 selected by neomycin (G418) and maintained. To prepare tumor spheroids,  $4 \times 10^3$  EGFP-  
379 expressing B16 cells per well were seeded in round-bottomed 96-well plates (Corning)  
380 and cultured in RPMI 1640 medium supplemented with 10% FBS, 2% B-27 supplement



381 (GIBCO), 2% methyl cellulose (Sigma-Aldrich), 1% pen/strep antibiotics and 1% NEAA.  
382 After 2 days, each formed spheroid was transferred as 1 spheroid per well and cultured  
383 for another 2 days. During LFM imaging, the GFP-B16 tumor spheroids were transferred  
384 to Lab-Tek II cover-glass-bottomed 8-chamber slides and imaged in HBSS supplemented  
385 with 2% FBS (all from Invitrogen) using a 63×/1.4 NA oil-immersion objective.

### 386 ***In vivo* imaging of zebrafish larvae**

387 All zebrafish experimental procedures were conducted with ethical approval from the  
388 Animal Care and Use Committee of Tsinghua University. For imaging of the vasculature  
389 and blood flow dynamics, *Tg(flk:EGFP; gata1:DsRed)* transgenic zebrafish embryos  
390 were collected and cultured at 28.5 °C in Holtfreter's solution. At 4–5 days  
391 postfertilization (dpf), the zebrafish larvae were anesthetized by ethyl 3-aminobenzoate  
392 methanesulfonate salt (100 mg/L) and mounted in 1% low-melting-point agarose for  
393 imaging at 26–27 °C. For whole-brain calcium imaging, *Tg(huc:GCaMP6)* transgenic  
394 zebrafish embryos were collected and kept at 28.5 °C in Holtfreter's solution. At 4-5 dpf,  
395 the larvae were mounted in 1% low-melting-point agarose for imaging at 26–27 °C.

396

### 397 **Preparation of fixed *Drosophila* brain samples**

398 All *Drosophila* experimental procedures were conducted with ethical approval from the  
399 Animal Care and Use Committee of Tsinghua University. Female *Drosophila* brains were  
400 dissected and fixed in 4% paraformaldehyde (PFA, Cat# AR-0211, Dingguo Biotech,  
401 China) at room temperature for 30 mins on a shaker. Each brain was rehydrated with  
402 0.3% Triton X-100 (Solarbio 524A0513) in phosphate-buffered saline (PBS) for 4×20  
403 mins at room temperature and then incubated in block solution (5% goat serum in washing  
404 buffer) for 30 mins at room temperature. The brain was then incubated overnight with  
405 primary antibody (mouse monoclonal nc82 (Developmental Studies Hybridoma Bank)),  
406 which was diluted at 1:500 in block solution at 4 °C. The brain was then washed in 0.5%

407 PBST for 3×1 hour at room temperature. Finally, the brain was mounted directly for  
408 imaging by LFM.

#### 409 **Imaging of *Drosophila* embryos**

410 All *Drosophila* embryos (Fig. 3) expressed histones tagged with EGFP (His2Av,  
411 BL24163). The collection and preparation of *Drosophila* embryos were performed  
412 according to the commonly used protocol<sup>40</sup>. Two-hour *Drosophila* embryos were  
413 collected within a specific collection chamber. After incubation at 25 °C for 10 hours,  
414 each embryo was attached to a glass microscope slide with double-sided sticky tape. We  
415 used forceps to carefully roll the embryo on the tape until its chorion popped open. Then,  
416 the embryo was transferred to the glue line on a dish (Ibidi  $\mu$ -Dish, 35 mm, high) and  
417 covered with mineral oil (Sigma-Aldrich, Halocarbon 27 oil) for live imaging.

#### 418 **Mouse experiments**

419 All procedures involving mice were approved by the Institutional Animal Care and Use  
420 Committee of Tsinghua University. We used both male and female C57BL/6 mice 10  
421 weeks to 6 months old without randomization or blinding. We performed the craniotomy  
422 as previously described<sup>41</sup>, with a window size of ~8 mm×8 mm. Then, we installed a flat  
423 optical window and cemented a custom-made coverslip (D-shape) and aluminum head  
424 posts to the skull. For acute imaging, we used adult double-transgenic Rasgrf2-2A-  
425 dCre/Ai148D mice (JAX No.: 022864 and 030328) to specifically label cortical layer 2/3  
426 neurons<sup>42</sup>. For chronic imaging, adult C57BL/6 mice injected with diluted AAV9-hSyn-  
427 GCaMP6s virus (from BrainVTA Technology Co., Ltd., China) were allowed to recover  
428 for at least 2 weeks after craniotomy. During LFM imaging, awake mice were placed in  
429 a tube with the head restrained under the objective.

#### 430 **Data analysis**

431 All data analyses were performed with customized MATLAB (MathWorks, MATLAB  
432 2018) programs and Amira (Thermo Fisher Scientific, Amira 2019). The hardware was  
433 controlled using LabVIEW 2018 (National Instruments). The 3D rendering of the  
434 volumes in figures and videos was performed by Amira. The 3D tracking of 7  
435 representative blood cells in the heart of the zebrafish larvae was carried out manually in  
436 MATLAB.

437

### 438 **Neural activity extraction**

439 The calcium responses in both zebrafish and mice were extracted directly through signal  
440 averaging of the manually selected ROIs covering the selected neurons. The ROIs were  
441  $\sim 8 \times 8 \times 10 \mu\text{m}^3$  in size for zebrafish larvae and  $\sim 10 \times 10 \times 10 \mu\text{m}^3$  in size for mice to match  
442 the size of the neuron. The temporal traces of neural activity were calculated by  $\Delta F/F_0 =$   
443  $(F - F_0)/F_0$ , where  $F$  is the raw averaged intensity of the ROI, and  $F_0$  is the baseline  
444 fluorescence intensity. To estimate  $F_0$  for each ROI, we first calculated the average  
445 intensity of the trace and averaged all time points with signals below 120% of the  
446 calculated average.

447

### 448 **Data availability**

449 All relevant data are available from the corresponding authors upon reasonable request.

450

### 451 **Code availability**

452 We will open all of codes with example datasets in Google Drive and Github after the  
453 paper is accepted.

454

### 455 **Acknowledgments**

456 We thank Li Yu, Jiesi Feng, Yulong Li, Jing He, Guihua Xiao, and Hao Xie for their  
457 assistance in sample preparation. This work was supported by the National Natural  
458 Science Foundation of China (61327902, 61827804, 61620106005), the Beijing

459 Municipal Science & Technology Commission (BMSTC) (No. Z181100003118014), the  
460 National Key Research and Development Program of China (2020AAA0130000), the  
461 Postdoctoral Science Foundation of China (2019M660644), and the Tsinghua University  
462 Initiative Scientific Research Program. J.W. sincerely appreciates funding from the  
463 National Postdoctoral Program for Innovative Talent.

464

#### 465 **Author contributions**

466 Q.D., X.J., and J.W. conceived and designed the project. Q.D. and X.J. supervised the  
467 research. Z.L. and J.W. designed and built the optical system. Y.Z., X.J. and J.W.  
468 conducted the numerical simulation and developed the deconvolution algorithm with the  
469 multiscale scattering model. J.W. and D.J. designed the biological experiments. X.L.  
470 conducted the hardware synchronization. J.X. derived the scattering model in incoherent  
471 conditions. T.Z. designed the graphical user interface for software control. D.J. prepared  
472 the zebrafish larvae. Z.L., Y.Z., D.J. and J.W. conducted most biological experiments,  
473 data collection and volume reconstructions. X.L. and Y.C. conducted algorithm  
474 performance optimization. Y.Z. designed the system calibration method. J.W., Z.L., Y.Z.,  
475 X.J., and Q.D. prepared figures and wrote the manuscript with input from all authors.

476

#### 477 **Competing financial interests**

478 The authors declare no competing financial interests.

479

#### 480 **Materials & correspondence**

481 Correspondence and requests for materials should be addressed to  
482 [qh dai@tsinghua.edu.cn](mailto:qh dai@tsinghua.edu.cn) (Q.D.), [xyji@tsinghua.edu.cn](mailto:xyji@tsinghua.edu.cn) (X.J.), and  
483 [wujiamin@tsinghua.edu.cn](mailto:wujiamin@tsinghua.edu.cn) (J.W.).

484

## 485 References

486

- 487 1. Weisenburger, S. & Vaziri, A. A guide to emerging technologies for large-scale  
488 and whole-brain optical imaging of neuronal activity. *Annu. Re. Neurosci.* **41**, 431-  
489 452 (2018).
- 490 2. Ji, N., Freeman, J. & Smith, S. L. Technologies for imaging neural activity in large  
491 volumes. *Nat. Neurosci.* **19**, 1154 (2016).
- 492 3. Pittet, M. J. & Weissleder, R. Intravital imaging. *Cell* **147**, 983-991 (2011).
- 493 4. Pawley, J.B. *Handbook of Biological Confocal Microscopy*, edn 2. (Plenum Press,  
494 New York, 1995).
- 495 5. Shimosawa, T. *et al.* Improving spinning disk confocal microscopy by preventing  
496 pinhole cross-talk for intravital imaging. *Proc. Natl. Acad. Sci. U. S. A.* **110**, 3399-  
497 3404 (2013).
- 498 6. Helmchen, F. & Denk, W. Deep tissue two-photon microscopy. *Nat. Methods* **2**,  
499 932-940 (2005).
- 500 7. Zhu, G., van Howe, J., Durst, M., Zipfel, W. R. & Xu, C. Simultaneous spatial and  
501 temporal focusing of femtosecond pulses. *Opt. Express* **13**, 2153–2159 (2005).
- 502 8. Bouchard, M. B. *et al.* Swept confocally-aligned planar excitation (SCAPE)  
503 microscopy for high-speed volumetric imaging of behaving organisms. *Nat.*  
504 *Photonics* **9**, 113-119 (2015).
- 505 9. Ahrens, M. B., Orger, M. B., Robson, D. N., Li, J. M. & Keller, P. J. Whole-brain  
506 functional imaging at cellular resolution using light-sheet microscopy. *Nat.*  
507 *Methods* **10**, 413-420 (2013).
- 508 10. Wu, Y. & Shroff, H. Faster, sharper, and deeper: structured illumination  
509 microscopy for biological imaging. *Nat. Methods* **15**, 1011-1019 (2018).
- 510 11. Mertz, J. Optical sectioning microscopy with planar or structured illumination. *Nat.*  
511 *Methods* **8**, 811–819 (2011).
- 512 12. Winter, P.W. & Shroff, H. Faster fluorescence microscopy: advances in high speed  
513 biological imaging. *Curr. Opin. Chem. Biol.* **20**, 46–53 (2014).
- 514 13. Laisue, P. P. *et al.* Assessing phototoxicity in live fluorescence imaging. *Nat.*  
515 *Methods* **14**, 657–661 (2017).
- 516 14. Prevedel, R. *et al.* Simultaneous whole-animal 3D imaging of neuronal activity  
517 using light-field microscopy. *Nat. Methods* **11**, 727-730 (2014).
- 518 15. Alonso, M. Wigner functions in optics: describing beams as ray bundles and pulses  
519 as particle ensembles. *Adv. Opt. Photon.* **3**, 272–365 (2011).
- 520 16. Waller, L., Situ, G. & Fleischer, J. W. Phase-space measurement and coherence  
521 synthesis of optical beams. *Nat. Photon.* **6**, 474–479 (2012).
- 522 17. Liu HY, Jonas E, Tian L, Zhong JS, Recht B *et al.* 3D imaging in volumetric  
523 scattering media using phase-space measurements. *Opt. Express* 2015; **23**: 14461–  
524 14471.
- 525 18. Takasaki, K. T. & Fleischer, J. W. Phase-space measurement for depth-resolved  
526 memory-effect imaging. *Opt. Express* **22**, 31426–31433 (2014).
- 527 19. Levoy, M., Ng, R., Adams, A., Footer, M. & Horowitz, M. Light field microscopy.  
528 *ACM Trans. Graph.* **25**, 924-934 (2006).
- 529 20. Tian, L., Zhang, Z., Petrucci, J. C. & Barbastathis, G. Wigner function  
530 measurement using a lenslet array. *Opt. Express* **21**, 10511-10525 (2013).
- 531 21. Wagner, N. *et al.* Instantaneous isotropic volumetric imaging of fast biological  
532 processes. *Nat. Methods* **16**, 497-500 (2019).

- 533 22. Lin, Q. *et al.* Cerebellar Neurodynamics Predict Decision Timing and Outcome on  
534 the Single-Trial Level. *Cell* **180**, 536-551 (2020).
- 535 23. Abrahamsson, S. *et al.* Fast multicolor 3D imaging using aberration-corrected  
536 multifocus microscopy. *Nat. Methods* **10**, 60-63 (2013).
- 537 24. Yang, W. *et al.* Simultaneous Multi-plane Imaging of Neural Circuits. *Neuron* **89**,  
538 269-284 (2016).
- 539 25. Xiao, S. *et al.* High-contrast multifocus microscopy with a single camera and z-  
540 splitter prism. *Optica* **7**, 1477-1486 (2020).
- 541 26. Taylor, M. A., Nöbauer, T., Pernia-Andrade, A., Schlumm, F. & Vaziri, A. Brain-  
542 wide 3D light-field imaging of neuronal activity with speckle-enhanced resolution.  
543 *Optica* **5**, 343-353 (2018)
- 544 27. Wagner, N. *et al.* Instantaneous isotropic volumetric imaging of fast biological  
545 processes. *Nat. Methods* **16**, 497-500 (2019).
- 546 28. Zhang, Z. *et al.* Imaging volumetric dynamics at high speed in mouse and zebrafish  
547 brain with confocal light field microscopy. *Nat. Biotechnol.* 1-10 (2020).
- 548 29. Lu, Z. *et al.* Phase-space deconvolution for light field microscopy. *Opt. Express*  
549 **27**, 18131-18145 (2019).
- 550 30. Broxton, M. *et al.* Wave optics theory and 3-D deconvolution for the light field  
551 microscope. *Opt. Express* **21**, 25418-25439 (2013).
- 552 31. Gustafsson, M. G. L. Nonlinear structured-illumination microscopy: Wide-field  
553 fluorescence imaging with theoretically unlimited resolution. *Proc. Natl. Acad. Sci.*  
554 *U.S.A.* **102**, 13081-13086 (2005).
- 555 32. Tian, L. & Waller, L. 3D intensity and phase imaging from light field  
556 measurements in an LED array microscope. *Optica* **2**, 104-111 (2015).
- 557 33. Born, M., Wolf, E. Principles of Optics: Electromagnetic Theory of Propagation,  
558 Interference and Diffraction of Light. *Elsevier* (2013).
- 559 34. Boyd, S., Parikh, N., Chu, E., Peleato, B. & Eckstein, J. Distributed optimization  
560 and statistical learning via the alternating direction method of multipliers.  
561 *Foundations and Trends in Machine Learning* **3**, 1-122 (2010).
- 562 35. Royer, L. A. *et al.* Adaptive light-sheet microscopy for long-term, high-  
563 resolution imaging in living organisms. *Nat. Biotechnol.* **34**, 1267-1278 (2016).
- 564 36. Nöbauer, T. *et al.* Video rate volumetric Ca<sup>2+</sup> imaging across cortex using seeded  
565 iterative demixing (SID) microscopy. *Nat. Methods* **14**, 811 (2017).
- 566 37. Pégard, N. C. *et al.* Compressive light-field microscopy for 3D neural activity  
567 recording. *Optica* **3**, 517-524 (2016).
- 568 38. Theer, P. & Denk, W. On the fundamental imaging-depth limit in two-photon  
569 microscopy. *J. Opt. Soc. Am. A* **23**, 3139-3149 (2006).
- 570 39. Chen, M., Ren, D., Liu, H.-Y., Chowdhury, S. & Waller, L. Multi-layer Born  
571 multiple-scattering model for 3D phase microscopy. *Optica* **7**, 394-403 (2020).
- 572 40. Conduit, P. T., Hayward, D. & Wakefield, J. G. Microinjection techniques for  
573 studying centrosome function in *Drosophila melanogaster* syncytial embryos.  
574 *Methods Cell Biol.* **129**, 229-249 (2015).
- 575 41. Chen, T. W. *et al.* Ultrasensitive fluorescent proteins for imaging neuronal activity.  
576 *Nature* **499**, 295-300 (2013).
- 577 42. Daigle, T. L. *et al.* A Suite of Transgenic Driver and Reporter Mouse Lines with  
578 Enhanced Brain-Cell-Type Targeting and Functionality. *Cell* **174**, 465-480 (2018).
- 579

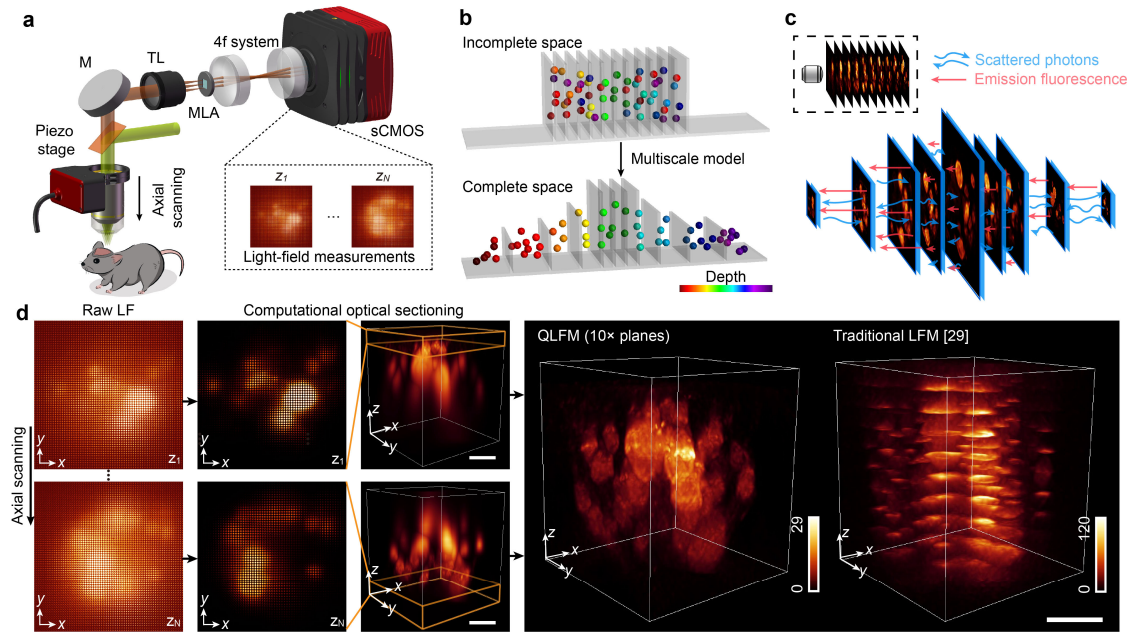

580

581 **Fig. 1 | Schematic of quantitative light-field microscopy (QLFM).** **a**, Experimental  
582 setup of our QLFM system with a simple microlens array (MLA) inserted at the image  
583 plane for snapshot phase-space measurements. A piezo stage is used for high-speed axial  
584 scanning at a large step size periodically. **b**, Concept of the multiscale model. Incomplete  
585 space used in traditional LFM reconstruction results in strong background noise and loss  
586 of quantitative properties in complicated environments. We apply different sampling rates  
587 in 3D based on the effective resolution of LFM at different axial planes to model a large  
588 volume for background rejection with an orders-of-magnitude reduction in computational  
589 cost. **c**, Schematic of the multiscale scattering model. We differentiate the multiple-  
590 scattered photons from native emission fluorescence in the multislice model based on the  
591 first Born approximation to retrieve 3D fluorescence quantitatively in deep tissue. **d**,  
592 Illustrations of the algorithm by imaging GFP-labeled B16 tumor spheroids. Due to the  
593 extended depth of field, even the out-of-focus fluorescence far from the native objective  
594 plane has apparent depth-dependent features in LFM, which can be reconstructed in the  
595 multiscale model for computational optical sectioning. The axially scanned LF images of  
596 10 planes can be realigned into multiple angular focal stacks to reconstruct the entire  
597 volume as a whole without artifacts. QLFM shows greatly improved resolution and  
598 contrast over traditional LFM which reconstructs each subvolume separately. Scale bars,  
599 30  $\mu\text{m}$ .

600

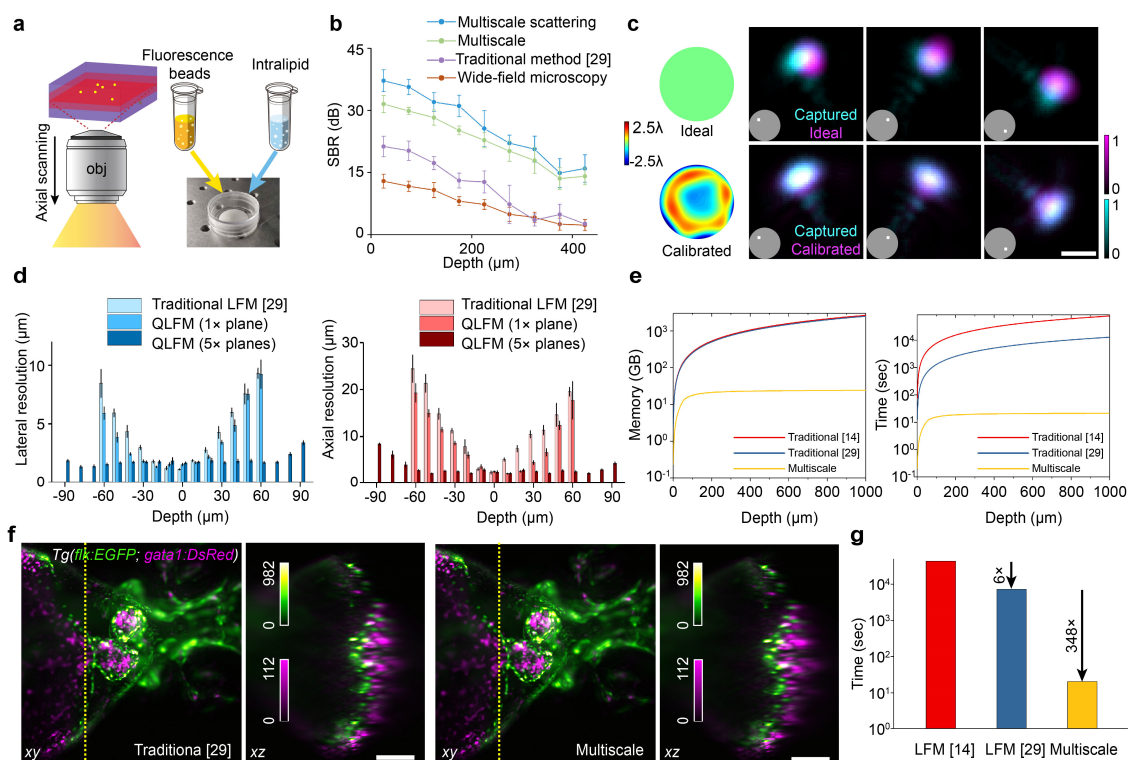

601

602 **Fig. 2 | Characterization of quantitative light-field microscopy (QLFM).** a, 603  
 604 Illustrations of the SBR characterization experiment. We fabricated the scattering 605  
 606 phantom with the mixture of 0.025% 2- $\mu\text{m}$  fluorescence beads, 1% intralipid, 1% agarose 607  
 608 in a petri dish. Then we imaged the sample with a 40 $\times$ /1.0NA water-immersion objective 609  
 610 at different penetration depths with WFM and LFM. b, SBR curves of the fluorescence 611  
 612 beads at different penetration depths in the intralipid-based tissue-mimicking phantom 613  
 614 obtained by WFM, traditional LFM, QLFM with the multiscale model only, and QLFM 615  
 616 with the multiscale scattering model. We chose 10 fluorescence beads with the highest 617  
 618 fitting degrees for each block covering approximately 40  $\mu\text{m}$ . QLFM shows  $\sim 20$  dB 619  
 improvement in the SBR over WFM, indicating an improved penetration depth in deep 620  
 tissue. c, Comparisons among the experimental PSF, the ideal PSF without aberrations, 621  
 and the calibrated PSF of several selected angular components marked in the inset under 622  
 the 40 $\times$ /1.0 NA water-immersion objective. The calibrated wavefront of the system 623  
 aberration estimated by our iterative phase-retrieval algorithm is shown on the left. d, 624  
 Lateral and axial resolution at different axial planes in traditional LFM and QLFM with 625  
 1 and 5 axially scanned planes, which is estimated by the FWHM of subdiffraction- 626  
 limited fluorescence beads. For each block covering 10  $\mu\text{m}$ , we chose 10 fluorescence 627



619 beads with the highest fitting degree for statistical analysis. **e**, The curves of the required  
620 memory and computation time versus the reconstructed depth range for each volume by  
621 different methods with a  $20\times/0.5\text{NA}$  objective, indicating that the multiscale model is  
622 essential to cover a large depth of range for computational optical sectioning. **f**,  
623 Orthogonal MIPs of the beating heart in zebrafish larvae reconstructed by different  
624 methods with a large axial range. The multiscale model shows similar performance as  
625 traditional methods with orders-of-magnitude reduction in computational costs. **g**, The  
626 bar graph shows the time required by different methods to reconstruct the volumes shown  
627 in **f**, covering about  $\sim 700\times 700\times 560\ \mu\text{m}^3$ . Scale bars,  $5\ \mu\text{m}$  (**c**) and  $100\ \mu\text{m}$  (**f**).

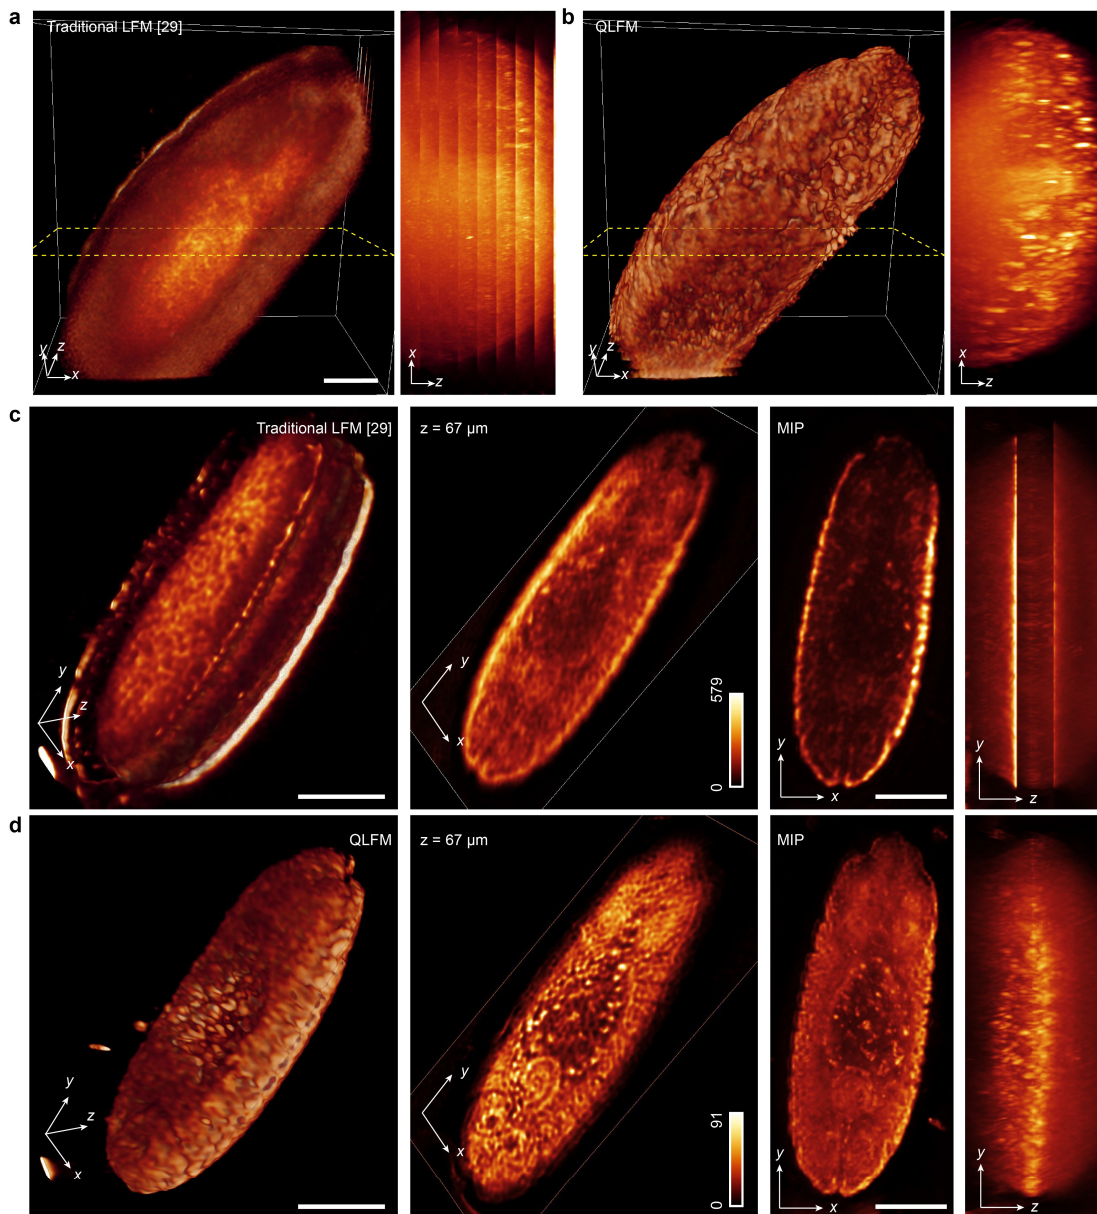

628

629 **Fig. 3 | Experimental comparisons on the *Drosophila* embryo with high-speed axial**  
630 **scanning. a-b, 3D rendered volumes and 180- $\mu$ m-xz MIPs at the same time point of**  
631 **traditional LFM and QLFM imaged with a 40 $\times$ /1.0NA water-immersion objective at a**  
632 **step of 15  $\mu$ m. QLFM show much better contrast and resolution than traditional LFM**  
633 **without artifacts, illustrating the capability of computational optical sectioning by QLFM**  
634 **with the improved penetration depth. c-d, The comparisons between traditional LFM and**  
635 **QLFM with a 20 $\times$ /0.5NA objective in the form of 3D rendered volumes, slices, and**  
636 **orthogonal MIPs with axial scanning at a step of 50  $\mu$ m indicating the uniform resolution**  
637 **of QLFM without edge artefacts. Scale bars, 50  $\mu$ m (a-b) and 100  $\mu$ m (c-d).**

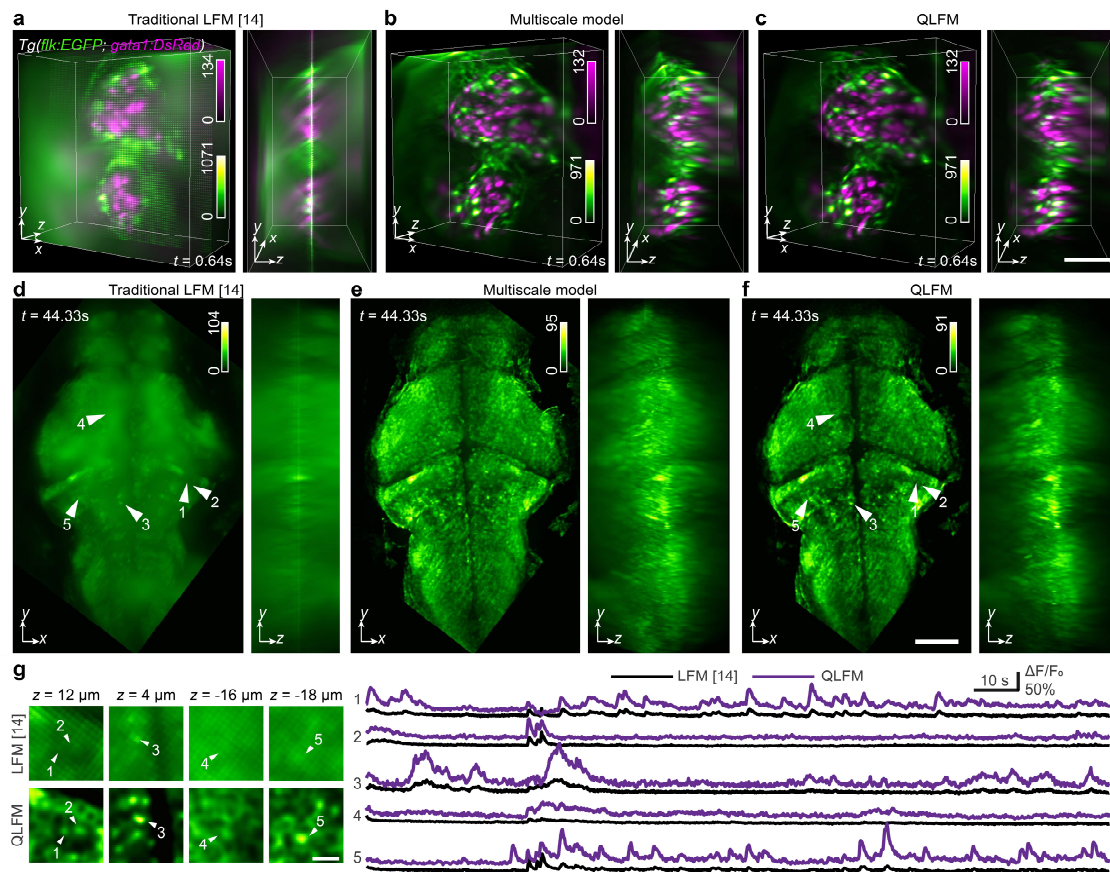

638

639 **Fig. 4 | High-speed volumetric imaging in larval zebrafish.** **a-c**, 3D rendered volumes  
 640 of the beating heart at the same time point reconstructed by the traditional LFM, QLFM  
 641 with the multiscale model only, and QLFM with the multiscale scattering model  
 642 (Supplementary Video 2). Successive improvements can be observed with significantly  
 643 reduced artifacts and background for quantitative imaging. **d-f**, Orthogonal maximum-  
 644 intensity projections (MIP) of the whole brain at the same time point reconstructed by the  
 645 traditional LFM, QLFM with the multiscale model only, and QLFM with the multiscale  
 646 scattering model, illustrating the effectiveness of computational optical sectioning in  
 647 densely labeled samples (Supplementary Video 3). **g**, Zoom-in slices of the same neurons  
 648 marked in **d** and **f** and their temporal traces for comparison, illustrating the improved  
 649 SBR. Scale bars, 50  $\mu\text{m}$  (**a-c**), 100  $\mu\text{m}$  (**d-f**) and 20  $\mu\text{m}$  (**g**).

650

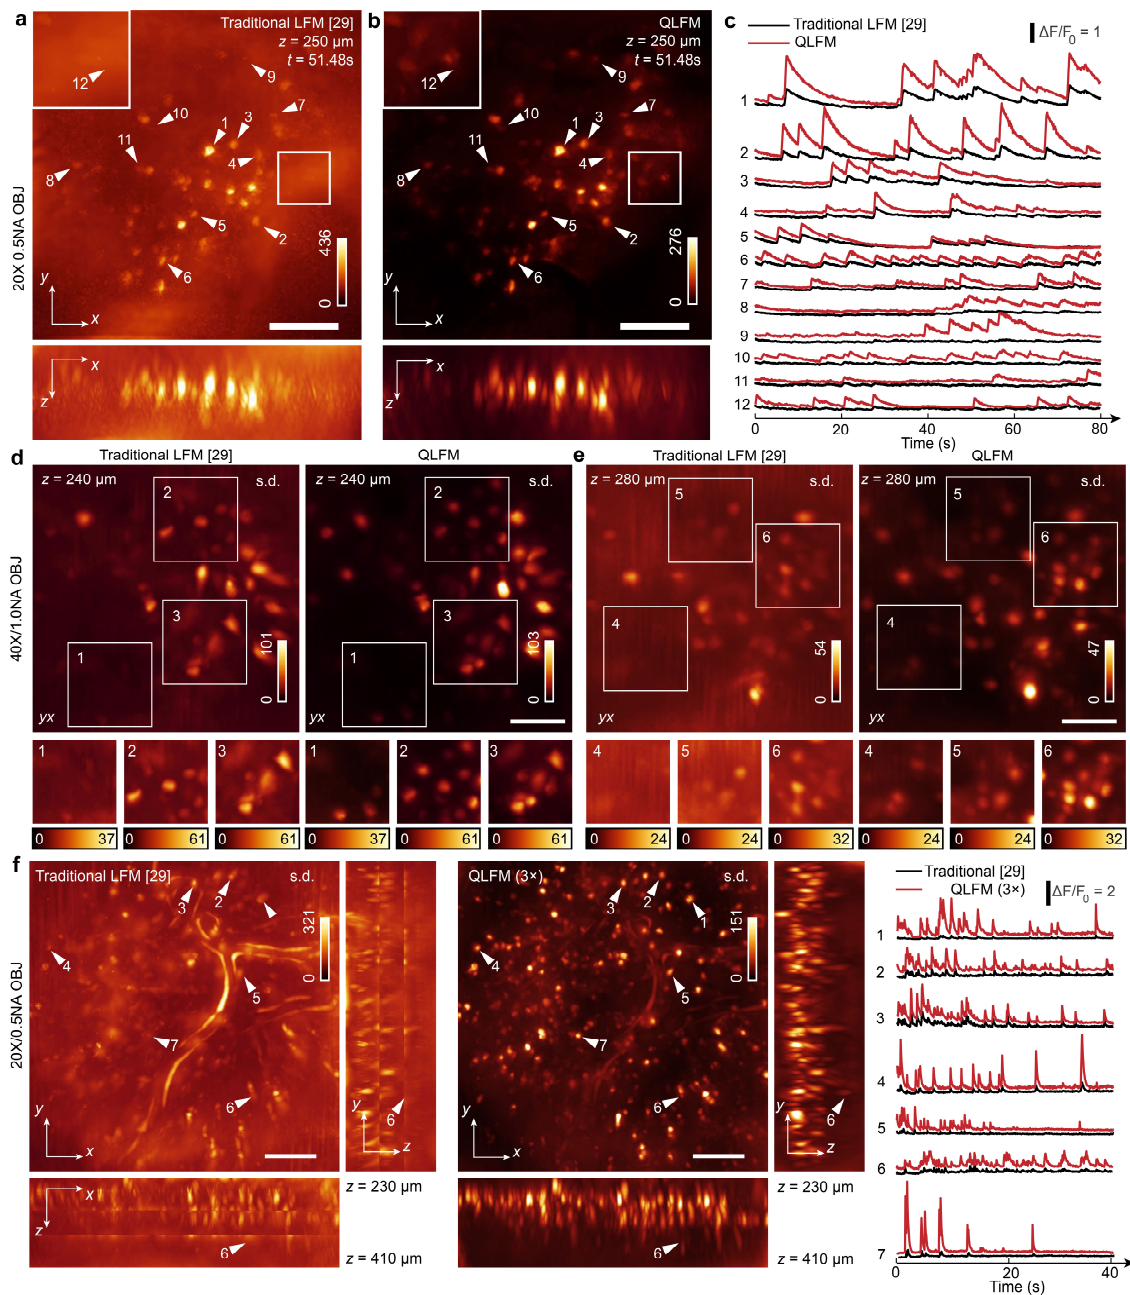

651

652 **Fig. 5 | 3D functional imaging in awake mouse brains.** a-b, Orthogonal MIPs of  
 653 GCaMP6s-labeled neurons at  $t=51.48$  s reconstructed by traditional LFM and QLFM with  
 654 a  $20\times/0.5\text{NA}$  objective, indicating the reduced background with computational optical  
 655 sectioning (Supplementary Video 4). More neurons were revealed by QLFM in the mouse  
 656 cortex with the native objective plane at a depth of  $\sim 250$   $\mu\text{m}$ . c, Temporal traces of the  
 657 marked neurons in a and b, demonstrating the quantitative calcium responses in QLFM  
 658 with improved contrast. d-e, Orthogonal MIPs of the standard deviation across 2000

659 volumes imaged at a center depth of 240  $\mu\text{m}$  and 280  $\mu\text{m}$  in the cortex, respectively, under  
660 a 40 $\times$ /1.0 NA water-immersion objective (Supplementary Video 5). **f**, Orthogonal MIPs  
661 of the standard deviation across 500 volumes for GCaMP6f-labeled L2/3 neurons in an  
662 awake behaving mice. The video was captured with high-speed axial scanning at a step  
663 of 50  $\mu\text{m}$  for 3 planes at 24 Hz with a 20 $\times$ /0.5 NA objective. Temporal traces of several  
664 marked neurons at different depths are shown on the right. QLFM shows uniform  
665 resolution and consistent calcium responses across a large depth range, while there is  
666 barely contrast in traditional LFM due to severe background. Scale bars, 100  $\mu\text{m}$  (**a-b, f**)  
667 and 50  $\mu\text{m}$  (**d-e**).
